# Supplementary material for: Strength of Vegetated Coal-Bearing Soil under Dry-Wet Cycles: An Experimental Study
Source: Hindawi journal article supplement (doi:10.1155/2021/6657160), 2021-10-21
Supplement: f1 [file 6657160.f1.pdf]

The data in the first part of this section

| Figure 5 (a) 100kPa |        |        |        |        | Figure 5 (a) 200kPa |        |        |         |        | Figure 5 (c) 300kPa |        |         |         |        |
|---------------------|--------|--------|--------|--------|---------------------|--------|--------|---------|--------|---------------------|--------|---------|---------|--------|
| strain              | 1#     | 2#     | 3#     | 4#     | strain              | 1#     | 2#     | 3#      | 4#     | strain              | 1#     | 2#      | 3#      | 4#     |
| 0                   | 0      | 0      | 0      | 0      | 0                   | 0      | 0      | 0       | 0      | 0                   | 0      | 0       | 0       | 0      |
| 0.004               | 33.01  | 59.89  | 54.06  | 23.01  | 0.004               | 24.42  | 29.28  | 23.11   | 21.83  | 0.0038              | 28.02  | 67.28   | 72.78   | 42.54  |
| 0.008               | 77.06  | 70.41  | 93.63  | 67.06  | 0.008               | 63.08  | 79.89  | 88.02   | 77.47  | 0.0075              | 70.88  | 117.86  | 91.37   | 115.09 |
| 0.011               | 149.55 | 124.57 | 156.47 | 99.55  | 0.011               | 119.52 | 120.41 | 140.88  | 104.72 | 0.0113              | 174.80 | 195.37  | 249.32  | 164.31 |
| 0.015               | 198.64 | 178.73 | 263.02 | 132.04 | 0.015               | 190.70 | 204.57 | 174.80  | 157.54 | 0.015               | 228.55 | 272.85  | 354.81  | 259.93 |
| 0.019               | 237.45 | 212.88 | 329.91 | 160.53 | 0.019               | 248.41 | 297.89 | 228.55  | 202.17 | 0.0188              | 321.30 | 346.79  | 437.87  | 326.03 |
| 0.023               | 268.08 | 247.04 | 386.61 | 189.01 | 0.023               | 291.10 | 369.21 | 321.30  | 236.85 | 0.0225              | 383.87 | 406.57  | 515.38  | 382.04 |
| 0.026               | 290.49 | 281.20 | 433.22 | 210.50 | 0.026               | 333.45 | 428.41 | 383.87  | 268.38 | 0.0263              | 431.06 | 460.06  | 578.64  | 435.69 |
| 0.03                | 312.91 | 315.36 | 464.66 | 225.99 | 0.03                | 370.64 | 481.37 | 441.06  | 299.65 | 0.03                | 478.24 | 510.24  | 633.63  | 471.31 |
| 0.034               | 330.32 | 340.51 | 496.09 | 241.48 | 0.034               | 407.53 | 525.30 | 488.04  | 327.82 | 0.0338              | 525.43 | 556.16  | 683.33  | 506.94 |
| 0.038               | 347.74 | 360.67 | 520.53 | 250.96 | 0.038               | 434.57 | 561.26 | 534.65  | 357.65 | 0.0375              | 562.62 | 600.75  | 733.59  | 535.57 |
| 0.041               | 365.16 | 375.83 | 544.96 | 260.45 | 0.041               | 466.13 | 596.91 | 580.88  | 382.52 | 0.0413              | 599.81 | 641.16  | 778.63  | 564.20 |
| 0.045               | 380.57 | 390.98 | 560.40 | 269.94 | 0.045               | 492.68 | 629.42 | 621.91  | 413.73 | 0.045               | 636.99 | 681.23  | 823.29  | 585.83 |
| 0.049               | 391.99 | 406.14 | 575.84 | 279.43 | 0.049               | 510.01 | 657.89 | 653.01  | 439.08 | 0.0488              | 664.18 | 720.96  | 862.81  | 607.46 |
| 0.053               | 403.41 | 420.30 | 591.27 | 286.92 | 0.053               | 527.34 | 678.63 | 681.93  | 460.21 | 0.0525              | 691.37 | 760.34  | 897.25  | 620.09 |
| 0.056               | 410.82 | 434.46 | 603.71 | 294.40 | 0.056               | 540.67 | 703.83 | 709.65  | 475.34 | 0.0563              | 718.55 | 795.63  | 934.22  | 632.71 |
| 0.06                | 418.24 | 444.61 | 616.14 | 301.89 | 0.06                | 554.00 | 724.17 | 735.24  | 490.47 | 0.06                | 735.74 | 828.75  | 961.47  | 640.34 |
| 0.064               | 423.66 | 454.77 | 625.58 | 308.38 | 0.064               | 563.33 | 744.31 | 760.59  | 500.60 | 0.0638              | 752.93 | 864.36  | 992.20  | 647.97 |
| 0.068               | 429.07 | 460.93 | 635.01 | 314.87 | 0.068               | 572.66 | 759.66 | 785.71  | 510.73 | 0.0675              | 770.12 | 895.95  | 1017.99 | 655.60 |
| 0.071               | 434.49 | 467.08 | 644.45 | 321.35 | 0.071               | 581.98 | 778.52 | 805.93  | 520.86 | 0.0713              | 780.30 | 924.48  | 1041.69 | 660.23 |
| 0.075               | 439.91 | 473.24 | 650.89 | 326.84 | 0.075               | 590.31 | 791.73 | 825.95  | 527.99 | 0.075               | 790.49 | 945.11  | 1060.53 | 664.86 |
| 0.079               | 443.32 | 479.40 | 657.32 | 332.33 | 0.079               | 598.64 | 804.79 | 845.79  | 535.12 | 0.0788              | 800.68 | 975.27  | 1081.02 | 669.48 |
| 0.083               | 446.74 | 483.55 | 661.76 | 337.82 | 0.083               | 606.97 | 817.72 | 860.81  | 542.25 | 0.0825              | 806.87 | 998.49  | 1102.22 | 674.11 |
| 0.086               | 450.16 | 487.71 | 666.19 | 342.31 | 0.086               | 615.30 | 829.61 | 875.68  | 546.38 | 0.0863              | 813.05 | 1019.66 | 1122.30 | 676.74 |
| 0.09                | 453.57 | 491.87 | 670.63 | 346.79 | 0.09                | 620.63 | 842.26 | 890.40  | 550.50 | 0.09                | 819.24 | 1041.52 | 1138.53 | 679.37 |
| 0.094               | 455.99 | 493.03 | 673.07 | 351.28 | 0.094               | 625.95 | 852.10 | 906.79  | 554.63 | 0.0938              | 823.43 | 1063.16 | 1153.68 | 681.00 |
| 0.098               | 458.40 | 494.18 | 675.50 | 355.77 | 0.098               | 631.28 | 864.50 | 920.28  | 558.76 | 0.0975              | 827.61 | 1080.11 | 1169.57 | 682.63 |
| 0.101               | 460.82 | 495.34 | 677.94 | 360.26 | 0.101               | 634.61 | 877.64 | 935.44  | 560.89 | 0.1013              | 831.80 | 1098.65 | 1186.17 | 684.25 |
| 0.105               | 463.24 | 496.50 | 680.37 | 363.74 | 0.105               | 637.94 | 887.11 | 947.74  | 563.02 | 0.105               | 833.99 | 1116.11 | 1199.92 | 685.88 |
| 0.109               | 464.65 | 496.65 | 682.81 | 367.23 | 0.109               | 641.27 | 897.34 | 961.69  | 565.15 | 0.1088              | 836.18 | 1133.38 | 1214.39 | 687.51 |
| 0.113               | 466.07 | 497.81 | 684.25 | 370.72 | 0.113               | 644.60 | 901.33 | 974.60  | 567.28 | 0.1125              | 838.36 | 1150.46 | 1230.47 | 689.14 |
| 0.116               | 467.49 | 498.97 | 685.68 | 374.21 | 0.116               | 647.93 | 905.31 | 980.24  | 569.41 | 0.1163              | 840.55 | 1168.23 | 1237.54 | 690.77 |
| 0.12                | 468.90 | 500.13 | 687.12 | 377.70 | 0.12                | 650.25 | 907.30 | 984.91  | 570.54 | 0.12                | 842.74 | 1184.05 | 1251.53 | 692.40 |
| 0.124               | 470.32 | 501.28 | 688.55 | 380.18 | 0.124               | 652.58 | 909.28 | 992.15  | 571.67 | 0.1238              | 844.93 | 1196.22 | 1261.86 | 694.02 |
| 0.128               | 471.74 | 502.44 | 689.99 | 382.67 | 0.128               | 654.91 | 911.27 | 998.41  | 572.80 | 0.1275              | 847.11 | 1210.33 | 1266.82 | 695.65 |
| 0.131               | 473.15 | 503.60 | 690.43 | 385.16 | 0.131               | 657.24 | 912.26 | 1000.21 | 573.93 | 0.1313              | 849.30 | 1224.44 | 1277.76 | 696.28 |
| 0.135               | 474.57 | 504.75 | 690.86 | 387.65 | 0.135               | 659.57 | 913.24 | 1003.70 | 575.06 | 0.135               | 850.49 | 1238.55 | 1288.56 | 696.91 |
| 0.139               | 475.99 | 505.91 | 691.30 | 390.13 | 0.139               | 661.90 | 914.23 | 1007.12 | 576.19 | 0.1388              | 851.67 | 1248.66 | 1299.36 | 697.54 |
| 0.143               | 477.40 | 507.07 | 691.73 | 391.62 | 0.143               | 663.22 | 915.21 | 1007.87 | 577.32 | 0.1425              | 852.86 | 1258.77 | 1308.15 | 698.17 |
| 0.146               | 478.82 | 508.23 | 692.17 | 393.11 | 0.146               | 664.55 | 916.20 | 1008.63 | 578.45 | 0.1463              | 854.05 | 1263.88 | 1316.95 | 698.80 |
| 0.15                | 480.24 | 509.38 | 692.61 | 394.60 | 0.15                | 665.88 | 917.18 | 1009.39 | 579.58 | 0.15                | 855.24 | 1268.99 | 1325.75 | 699.42 |
| 0.154               | 481.65 | 510.54 | 693.04 | 396.09 | 0.154               | 667.21 | 918.17 | 1010.15 | 580.71 | 0.1538              | 856.42 | 1274.10 | 1334.54 | 700.05 |
| 0.158               | 483.07 | 511.70 | 693.48 | 397.57 | 0.158               | 668.54 | 919.15 | 1010.91 | 581.84 | 0.1575              | 857.61 | 1279.22 | 1343.34 | 700.68 |

| Figure 5 (b) 100kPa |         |        |        |        | Figure 5 (b) 200kPa |        |        |         |        | Figure 5 (b) 300kPa |        |           |         |         |
|---------------------|---------|--------|--------|--------|---------------------|--------|--------|---------|--------|---------------------|--------|-----------|---------|---------|
| strain              | 5#      | 6#     | 7#     | 8#     | strain              | 5#     | 6#     | 7#      | 8#     | strain              | 5#     | 6#        | 7#      | 8#      |
| 0                   | 0       | 0      | 0      | 0      | 0                   | 0      | 0      | 0       | 0      | 0                   | 0      | 0         | 0       | 0       |
| 0.004               | 39.0878 | 24.955 | 49.329 | 30.367 | 0.004               | 17.086 | 51.646 | 33.0106 | 39.575 | 0.0038              | 32.589 | 39.57527  | 59.8874 | 64.0622 |
| 0.008               | 79.0317 | 69.66  | 71.19  | 41.346 | 0.008               | 30.553 | 98.938 | 85.9221 | 134.21 | 0.0075              | 77.216 | 134.20644 | 140.412 | 73.6321 |
| 0.011               | 111.664 | 113.78 | 107.09 | 106.49 | 0.011               | 86.143 | 149.81 | 153.945 | 191.44 | 0.0113              | 137.79 | 191.44347 | 204.57  | 156.472 |
| 0.015               | 139.047 | 152.76 | 156.53 | 160.13 | 0.015               | 134.96 | 196.35 | 247.345 | 268.94 | 0.015               | 202    | 268.93658 | 297.892 | 263.018 |
| 0.019               | 168.195 | 186.53 | 197.65 | 200.4  | 0.019               | 173.4  | 232.75 | 340.022 | 326.34 | 0.0188              | 239.71 | 326.33723 | 369.211 | 329.912 |
| 0.023               | 187.259 | 205.37 | 224.59 | 231.41 | 0.023               | 210.56 | 263.02 | 407.431 | 365.81 | 0.0225              | 275.2  | 365.81471 | 428.406 | 386.608 |
| 0.026               | 206.17  | 228.92 | 252.31 | 258.23 | 0.026               | 238.73 | 293.04 | 464.84  | 400.14 | 0.0263              | 304.67 | 400.13953 | 481.368 | 433.22  |
| 0.03                | 223.951 | 247.43 | 272.93 | 280.89 | 0.03                | 260.89 | 318.95 | 522.249 | 434.46 | 0.03                | 327.24 | 434.46434 | 525.3   | 474.656 |
| 0.034               | 233.794 | 260.96 | 298.28 | 299.44 | 0.034               | 280.96 | 338.87 | 569.657 | 460.79 | 0.0338              | 347.72 | 460.78916 | 561.255 | 510.973 |
| 0.038               | 242.583 | 274.37 | 315.62 | 317.83 | 0.038               | 298.94 | 364.38 | 607.066 | 487.11 | 0.0375              | 367.08 | 487.11398 | 596.906 | 546.035 |
| 0.041               | 251.295 | 287.67 | 334.76 | 332.18 | 0.041               | 312.02 | 382.04 | 644.475 | 513.44 | 0.0413              | 381.58 | 513.43879 | 629.421 | 577.956 |
| 0.045               | 259.932 | 296.08 | 348.91 | 347.38 | 0.045               | 320.24 | 399.54 | 671.884 | 530.76 | 0.045               | 391.26 | 530.76361 | 657.894 | 603.942 |
| 0.049               | 268.492 | 304.41 | 362.94 | 358.58 | 0.049               | 330.28 | 414.99 | 689.292 | 548.09 | 0.0488              | 404.59 | 548.08843 | 678.628 | 629.699 |
| 0.053               | 277.931 | 310.77 | 382.6  | 370.64 | 0.053               | 337.41 | 429.37 | 706.701 | 565.41 | 0.0525              | 415    | 565.41324 | 703.833 | 653.355 |
| 0.056               | 285.384 | 320.84 | 398.27 | 383.56 | 0.056               | 344.46 | 441.73 | 714.11  | 580.74 | 0.0563              | 422.55 | 580.73806 | 724.167 | 671.205 |
| 0.06                | 292.768 | 328.01 | 404.29 | 391.59 | 0.06                | 352.38 | 449.3  | 721.519 | 592.06 | 0.06                | 430.93 | 592.06288 | 744.31  | 687.03  |
| 0.064               | 295.365 | 331.36 | 424.47 | 401.44 | 0.064               | 357.44 | 461.45 | 726.928 | 603.39 | 0.0638              | 436.49 | 603.38769 | 759.659 | 698.079 |

|       |         |        |        |        |       |        |        |         |        |        |        |           |         |         |
|-------|---------|--------|--------|--------|-------|--------|--------|---------|--------|--------|--------|-----------|---------|---------|
| 0.068 | 300.752 | 336.53 | 442.58 | 409.31 | 0.068 | 363.37 | 468.85 | 732.336 | 614.71 | 0.0675 | 441.06 | 614.71251 | 778.523 | 709.015 |
| 0.071 | 307.021 | 343.51 | 448.31 | 423.7  | 0.071 | 368.32 | 476.17 | 737.745 | 624.04 | 0.0713 | 447.41 | 624.03733 | 791.725 | 722.587 |
| 0.075 | 307.636 | 349.5  | 459.6  | 431.39 | 0.075 | 374.13 | 496.31 | 742.154 | 633.36 | 0.075  | 452.78 | 633.36214 | 804.79  | 732.369 |
| 0.079 | 314.734 | 351.74 | 476.37 | 438.07 | 0.079 | 377.14 | 502.51 | 745.563 | 642.69 | 0.0788 | 458.99 | 642.68696 | 817.718 | 745.681 |
| 0.083 | 318.99  | 357.63 | 486.49 | 445.61 | 0.083 | 381.03 | 504.99 | 748.971 | 650.01 | 0.0825 | 464.23 | 650.01178 | 829.607 | 751.613 |
| 0.086 | 322.279 | 359.79 | 493.74 | 451.21 | 0.086 | 385.77 | 511.97 | 752.38  | 657.34 | 0.0863 | 468.52 | 657.33659 | 842.265 | 759.271 |
| 0.09  | 330.116 | 363.75 | 503.68 | 454.91 | 0.09  | 388.65 | 518.88 | 754.789 | 664.66 | 0.09   | 471.87 | 664.66141 | 852.103 | 766.838 |
| 0.094 | 336.049 | 371.28 | 512.6  | 461.32 | 0.094 | 393.3  | 525.72 | 757.198 | 671.99 | 0.0938 | 477.83 | 671.98623 | 864.497 | 777.89  |
| 0.098 | 338.285 | 373.32 | 519.6  | 467.66 | 0.098 | 398.78 | 529.78 | 759.607 | 677.31 | 0.0975 | 481.95 | 677.31104 | 877.641 | 781.698 |
| 0.101 | 344.112 | 377.13 | 524.71 | 473.94 | 0.101 | 400.64 | 536.48 | 762.015 | 682.64 | 0.1013 | 486.9  | 682.63586 | 887.11  | 787.218 |
| 0.105 | 350.78  | 384.47 | 526.13 | 480.15 | 0.105 | 406.02 | 542.2  | 764.424 | 687.96 | 0.105  | 491.79 | 687.96068 | 897.343 | 789.13  |
| 0.109 | 352.889 | 390.85 | 532.93 | 484.47 | 0.109 | 412.22 | 547.86 | 766.833 | 691.29 | 0.1088 | 496.62 | 691.28549 | 901.328 | 795.392 |
| 0.113 | 357.651 | 394.5  | 538.76 | 487.85 | 0.113 | 415.71 | 551.69 | 769.242 | 694.61 | 0.1125 | 502.26 | 694.61031 | 914.829 | 805.07  |
| 0.116 | 364.139 | 397.21 | 542.73 | 493.87 | 0.116 | 418.29 | 555.46 | 771.65  | 697.94 | 0.1163 | 507.69 | 697.93513 | 926.442 | 810.277 |
| 0.12  | 365.241 | 402.53 | 544.87 | 498.92 | 0.12  | 423.44 | 560.92 | 773.059 | 701.26 | 0.12   | 513.12 | 701.25994 | 933.6   | 815.408 |
| 0.124 | 370.732 | 404.29 | 548.75 | 500.36 | 0.124 | 427.05 | 567.19 | 774.468 | 703.58 | 0.1238 | 518.55 | 703.58476 | 938.759 | 820.463 |
| 0.128 | 371.769 | 409.49 | 550.8  | 505.31 | 0.128 | 430.67 | 572.52 | 775.877 | 705.91 | 0.1275 | 522.98 | 705.90958 | 943.917 | 824.518 |
| 0.131 | 377.158 | 416.38 | 554.58 | 511.96 | 0.131 | 433.29 | 577.64 | 777.286 | 708.23 | 0.1313 | 527.41 | 708.23439 | 947.075 | 828.573 |
| 0.135 | 383.357 | 419.73 | 559.17 | 514.15 | 0.135 | 435.91 | 582.76 | 778.694 | 710.56 | 0.135  | 531.84 | 710.55921 | 950.233 | 832.628 |
| 0.139 | 386.885 | 423.08 | 563.71 | 517.17 | 0.139 | 437.53 | 586.89 | 780.103 | 711.88 | 0.1388 | 535.27 | 711.88403 | 952.391 | 835.682 |
| 0.143 | 390.368 | 425.44 | 567.24 | 522.76 | 0.143 | 439.14 | 591.01 | 781.512 | 713.21 | 0.1425 | 538.7  | 713.20884 | 954.549 | 838.737 |
| 0.146 | 392.85  | 427.79 | 570.78 | 527.41 | 0.146 | 440.76 | 594.13 | 781.921 | 714.53 | 0.1463 | 542.13 | 714.53366 | 956.707 | 841.792 |
| 0.15  | 395.333 | 430.14 | 573.32 | 529.55 | 0.15  | 441.38 | 596.25 | 782.329 | 715.86 | 0.15   | 544.56 | 715.85848 | 957.865 | 843.847 |
| 0.154 | 397.815 | 432.5  | 575.85 | 531.69 | 0.154 | 442    | 598.37 | 782.738 | 717.18 | 0.1538 | 546.99 | 717.1833  | 959.023 | 845.902 |
| 0.158 | 400.298 | 434.85 | 578.39 | 533.83 | 0.158 | 442.62 | 600.49 | 783.147 | 718.51 | 0.1575 | 549.42 | 718.50811 | 960.181 | 847.957 |

| Figure 5 (c) 100kPa |         |        |        |        | Figure 5 (c) 200kPa |        |        |         |        | Figure 5 (c) 300kPa |        |           |         |         |
|---------------------|---------|--------|--------|--------|---------------------|--------|--------|---------|--------|---------------------|--------|-----------|---------|---------|
| strain              | 9#      | 10#    | 11#    | 12#    | strain              | 9#     | 10#    | 11#     | 12#    | strain              | 9#     | 10#       | 11#     | 12#     |
| 0                   | 0       | 0      | 0      | 0      | 0                   | 0      | 0      | 0       | 0      | 0                   | 0      | 0         | 0       | 0       |
| 0.004               | 33.1988 | 15.184 | 27.125 | 30.024 | 0.004               | 39.088 | 10.122 | 7.0857  | 35.755 | 0.0038              | 28.22  | 20.24486  | 35.7549 | 5.06121 |
| 0.008               | 58.0471 | 24.202 | 95.077 | 81.754 | 0.008               | 79.032 | 20.169 | 33.194  | 71.448 | 0.0075              | 67.656 | 41.17709  | 81.4479 | 35.0422 |
| 0.011               | 127.496 | 46.213 | 125.62 | 115.21 | 0.011               | 111.66 | 30.139 | 51.1433 | 107.98 | 0.0113              | 91.83  | 62.10932  | 137.98  | 85.0231 |
| 0.015               | 161.414 | 64.052 | 144.01 | 135.55 | 0.015               | 139.05 | 37.063 | 85.0447 | 130.72 | 0.015               | 156.57 | 80.04155  | 176.717 | 135.037 |
| 0.019               | 190.331 | 74.775 | 151.38 | 152.76 | 0.019               | 168.19 | 49.85  | 119.64  | 153.45 | 0.0188              | 221.32 | 97.97377  | 205.37  | 174.475 |
| 0.023               | 219.248 | 81.442 | 153.75 | 166.9  | 0.023               | 187.26 | 61.578 | 148.979 | 170.19 | 0.0225              | 263.06 | 115.906   | 226.001 | 213.4   |
| 0.026               | 230.166 | 86.076 | 159.05 | 174.08 | 0.026               | 206.17 | 73.214 | 160.28  | 186.93 | 0.0263              | 304.81 | 130.83823 | 242.583 | 247.345 |
| 0.03                | 236.083 | 93.629 | 161.36 | 180.22 | 0.03                | 223.95 | 85.745 | 165.576 | 200.67 | 0.03                | 336.55 | 144.77046 | 253.228 | 271.291 |
| 0.034               | 242.001 | 96.213 | 162.68 | 184.36 | 0.034               | 233.79 | 94.249 | 170.826 | 210.4  | 0.0338              | 358.3  | 158.70269 | 260.895 | 285.236 |
| 0.038               | 246.918 | 102.68 | 164.96 | 190.4  | 0.038               | 242.58 | 99.751 | 172.119 | 220.14 | 0.0375              | 370.04 | 170.63492 | 268.492 | 299.181 |
| 0.041               | 251.835 | 105.21 | 167.21 | 193.5  | 0.041               | 251.3  | 107.16 | 172.423 | 229.88 | 0.0413              | 381.78 | 182.56715 | 275.066 | 310.127 |
| 0.045               | 255.753 | 109.65 | 168.47 | 196.57 | 0.045               | 259.93 | 112.56 | 176.6   | 236.61 | 0.045               | 390.53 | 194.49938 | 279.774 | 321.072 |
| 0.049               | 258.67  | 114.05 | 167.81 | 197.7  | 0.049               | 268.49 | 118.88 | 179.773 | 243.35 | 0.0488              | 399.27 | 205.43161 | 284.481 | 330.017 |
| 0.053               | 261.587 | 118.41 | 169.05 | 200.72 | 0.053               | 277.93 | 124.19 | 180.027 | 250.09 | 0.0525              | 403.02 | 214.36383 | 288.189 | 338.963 |
| 0.056               | 263.505 | 121.78 | 172.18 | 203.71 | 0.056               | 285.38 | 129.45 | 184.109 | 255.82 | 0.0563              | 405.76 | 223.29606 | 291.897 | 345.908 |
| 0.06                | 265.422 | 126.07 | 174.33 | 203.83 | 0.06                | 292.77 | 134.67 | 186.243 | 261.56 | 0.06                | 408.5  | 230.22829 | 294.605 | 352.853 |
| 0.064               | 267.339 | 129.37 | 174.58 | 203.95 | 0.064               | 295.37 | 137.94 | 188.353 | 267.3  | 0.0638              | 411.25 | 237.16052 | 297.313 | 358.799 |
| 0.068               | 269.257 | 132.65 | 175.75 | 205.93 | 0.068               | 300.75 | 140.23 | 191.389 | 272.04 | 0.0675              | 413.99 | 242.09275 | 300.02  | 362.744 |
| 0.071               | 271.174 | 136.83 | 177.85 | 207.89 | 0.071               | 307.02 | 143.44 | 192.507 | 276.77 | 0.0713              | 416.04 | 247.02498 | 302.028 | 365.689 |
| 0.075               | 272.092 | 139.1  | 179.92 | 208.89 | 0.075               | 312.64 | 146.62 | 192.669 | 281.51 | 0.075               | 418.08 | 251.95721 | 304.036 | 368.635 |
| 0.079               | 273.009 | 142.28 | 181.97 | 208.96 | 0.079               | 316.25 | 149.77 | 192.824 | 285.25 | 0.0788              | 420.13 | 254.88944 | 306.044 | 370.58  |
| 0.083               | 273.926 | 145.43 | 182.15 | 211.78 | 0.083               | 319.86 | 153.82 | 195.768 | 288.98 | 0.0825              | 422.17 | 257.82166 | 308.052 | 372.525 |
| 0.086               | 274.844 | 147.62 | 184.16 | 213.66 | 0.086               | 322.48 | 155.05 | 198.682 | 292.72 | 0.0863              | 423.21 | 260.75389 | 310.059 | 374.471 |
| 0.09                | 275.761 | 149.79 | 186.15 | 214.6  | 0.09                | 325.09 | 159.03 | 199.715 | 295.46 | 0.09                | 424.26 | 263.68612 | 311.067 | 376.416 |
| 0.094               | 276.678 | 151.93 | 187.2  | 215.52 | 0.094               | 327.71 | 161.14 | 198.892 | 298.19 | 0.0938              | 425.3  | 266.61835 | 312.075 | 377.361 |
| 0.098               | 277.596 | 153.14 | 187.33 | 218.24 | 0.098               | 330.32 | 162.31 | 199.903 | 300.93 | 0.0975              | 426.35 | 268.55058 | 313.083 | 378.307 |
| 0.101               | 278.513 | 155.24 | 190.17 | 220.93 | 0.101               | 332.94 | 165.29 | 202.725 | 303.67 | 0.1013              | 427.39 | 270.48281 | 314.09  | 379.252 |
| 0.105               | 279.431 | 157.32 | 192.07 | 220.89 | 0.105               | 335.05 | 168.23 | 204.608 | 306.41 | 0.105               | 428.43 | 272.41504 | 315.098 | 380.197 |
| 0.109               | 280.348 | 159.38 | 193.06 | 221.74 | 0.109               | 337.17 | 169.34 | 204.656 | 309.14 | 0.1088              | 429.48 | 274.34727 | 316.106 | 381.143 |
| 0.113               | 281.265 | 161.41 | 194.03 | 224.36 | 0.113               | 339.08 | 172.23 | 204.697 | 311.88 | 0.1125              | 430.52 | 276.27949 | 317.014 | 382.088 |
| 0.116               | 282.083 | 164.32 | 196.76 | 226.06 | 0.116               | 341    | 174.2  | 206.526 | 314.62 | 0.1163              | 431.07 | 277.21172 | 317.922 | 383.033 |
| 0.12                | 282.9   | 165.41 | 199.46 | 225.97 | 0.12                | 342.91 | 176.14 | 208.332 | 317.35 | 0.12                | 431.61 | 278.14395 | 318.829 | 383.979 |
| 0.124               | 283.717 | 166.49 | 200.37 | 228.51 | 0.124               | 344.83 | 178.95 | 210.115 | 319.09 | 0.1238              | 432.16 | 279.07618 | 319.737 | 384.924 |
| 0.128               | 284.535 | 169.32 | 202.14 | 231.02 | 0.128               | 346.44 | 180.85 | 210.989 | 320.64 | 0.1275              | 432.7  | 280.00841 | 320.645 | 385.869 |
| 0.131               | 285.352 | 171.24 | 203.89 | 233.53 | 0.131               | 348.06 | 181.84 | 211.847 | 321.55 | 0.1313              | 433.24 | 280.94064 | 321.553 | 386.815 |
| 0.135               | 286.169 | 172.26 | 205.64 | 235.21 | 0.135               | 349.67 | 182.81 | 212.69  | 322.46 | 0.135               | 433.79 | 281.47287 | 322.46  | 387.36  |
| 0.139               | 286.987 | 173.27 | 206.39 | 236.9  | 0.139               | 351.29 | 185.52 | 214.394 | 323.37 | 0.1388              | 434.33 | 282.0051  | 323.368 | 387.905 |
| 0.143               | 287.804 | 176    | 207.14 | 237.58 | 0.143               | 352.9  | 187.32 | 215.203 | 324.28 | 0.1425              | 434.88 | 282.53733 | 324.276 | 388.451 |
| 0.146               | 288.622 | 176.96 | 207.89 | 238.26 | 0.146               | 354.52 | 190.84 | 216.864 | 325.18 | 0.1463              | 435.42 | 283.06955 | 325.184 | 388.996 |

|       |         |        |        |        |       |        |        |         |        |        |        |           |         |         |
|-------|---------|--------|--------|--------|-------|--------|--------|---------|--------|--------|--------|-----------|---------|---------|
| 0.15  | 289.439 | 177.93 | 208.64 | 238.95 | 0.15  | 356.13 | 192.46 | 217.039 | 326.09 | 0.15   | 435.86 | 283.60178 | 326.092 | 389.541 |
| 0.154 | 290.256 | 178.89 | 209.39 | 239.63 | 0.154 | 357.74 | 194.07 | 217.213 | 327    | 0.1538 | 436.31 | 284.03401 | 326.999 | 390.087 |
| 0.158 | 291.074 | 179.86 | 210.13 | 240.31 | 0.158 | 359.36 | 195.69 | 217.388 | 327.91 | 0.1575 | 436.75 | 284.46624 | 327.907 | 390.632 |

| Figure 5 (d) 100kPa |         |        |        |        | Figure 5 (d) 200kPa |        |        |         |        | Figure 5 (d) 300kPa |        |           |         |         |
|---------------------|---------|--------|--------|--------|---------------------|--------|--------|---------|--------|---------------------|--------|-----------|---------|---------|
| strain              | 13#     | 14#    | 15#    | 16#    | strain              | 13#    | 14#    | 15#     | 16#    | strain              | 13#    | 14#       | 15#     | 16#     |
| 0                   | 0       | 0      | 0      | 0      | 0                   | 0      | 0      | 0       | 0      | 0                   | 0      | 0         | 0       | 0       |
| 0.004               | 49.966  | 23.019 | 27.331 | 13.159 | 0.004               | 40.104 | 25.061 | 12.1469 | 49.056 | 0.0038              | 43.035 | 17.0857   | 10.1224 | 31.7821 |
| 0.008               | 74.9469 | 30.907 | 28.236 | 27.228 | 0.008               | 86.108 | 55.126 | 28.1012 | 89.7   | 0.0075              | 93.838 | 58.06746  | 25.1265 | 77.5965 |
| 0.011               | 89.9279 | 40.721 | 44.203 | 36.236 | 0.011               | 112.11 | 80.139 | 44.0555 | 119.18 | 0.0113              | 148.98 | 73.0416   | 40.1306 | 110.384 |
| 0.015               | 104.909 | 50.458 | 50.041 | 53.054 | 0.015               | 138.11 | 103.08 | 60.0098 | 131.59 | 0.015               | 187.98 | 88.01574  | 52.1346 | 154.137 |
| 0.019               | 116.89  | 58.149 | 54.835 | 64.871 | 0.019               | 160.12 | 124.63 | 72.964  | 139.95 | 0.0188              | 202.04 | 100.98989 | 64.1387 | 174.075 |
| 0.023               | 125.871 | 59.887 | 57.605 | 73.689 | 0.023               | 180.12 | 139.05 | 85.9183 | 147.26 | 0.0225              | 213.04 | 113.96403 | 76.1427 | 188.983 |
| 0.026               | 134.852 | 65.523 | 59.363 | 80.507 | 0.026               | 200.12 | 145.44 | 98.8726 | 154.58 | 0.0263              | 221.99 | 124.93817 | 86.1468 | 196.977 |
| 0.03                | 140.833 | 69.164 | 64.062 | 86.325 | 0.03                | 214.13 | 152.76 | 110.827 | 160.89 | 0.03                | 228.92 | 135.91231 | 96.1509 | 204.902 |
| 0.034               | 144.814 | 72.775 | 65.778 | 92.143 | 0.034               | 224.13 | 157.08 | 120.781 | 167.2  | 0.0338              | 237.73 | 145.88645 | 106.155 | 209.871 |
| 0.038               | 147.795 | 77.322 | 70.412 | 96.961 | 0.038               | 234.13 | 161.36 | 128.735 | 172.52 | 0.0375              | 244.53 | 155.86059 | 114.159 | 214.794 |
| 0.041               | 150.775 | 77.98  | 73.061 | 101.78 | 0.041               | 242.14 | 165.6  | 134.69  | 177.83 | 0.0413              | 246.45 | 163.83473 | 122.163 | 219.671 |
| 0.045               | 152.756 | 84.383 | 73.745 | 105.6  | 0.045               | 250.14 | 171.75 | 140.644 | 183.14 | 0.045               | 254.11 | 171.80887 | 130.167 | 224.502 |
| 0.049               | 153.737 | 86.913 | 74.422 | 109.41 | 0.049               | 256.14 | 176.87 | 145.598 | 187.46 | 0.0488              | 258.83 | 178.78301 | 137.171 | 231.183 |
| 0.053               | 154.718 | 88.469 | 77.98  | 112.23 | 0.053               | 260.15 | 178.1  | 150.553 | 191.77 | 0.0525              | 261.6  | 185.75715 | 144.175 | 234.028 |
| 0.056               | 155.399 | 91.905 | 80.548 | 115.05 | 0.056               | 264.15 | 183.15 | 154.507 | 195.08 | 0.0563              | 268.13 | 191.7313  | 151.179 | 239.662 |
| 0.06                | 156.08  | 94.366 | 81.183 | 117.47 | 0.06                | 267.15 | 186.24 | 158.461 | 198.39 | 0.06                | 268.94 | 197.70544 | 158.183 | 240.562 |
| 0.064               | 156.761 | 94.925 | 81.81  | 119.89 | 0.064               | 270.16 | 187.4  | 161.415 | 200.71 | 0.0638              | 276.32 | 202.67958 | 164.187 | 247.041 |
| 0.068               | 157.242 | 99.22  | 82.43  | 122.3  | 0.068               | 273.16 | 189.49 | 164.37  | 203.02 | 0.0675              | 280.81 | 207.65372 | 170.191 | 248.816 |
| 0.071               | 157.723 | 102.55 | 85.873 | 124.22 | 0.071               | 275.16 | 193.45 | 167.324 | 205.33 | 0.0713              | 284.33 | 211.62786 | 176.196 | 255.192 |
| 0.075               | 158.204 | 103.98 | 88.346 | 126.14 | 0.075               | 277.17 | 194.55 | 170.278 | 207.65 | 0.075               | 290.6  | 215.602   | 182.2   | 257.824 |
| 0.079               | 158.685 | 106.33 | 88.924 | 128.06 | 0.079               | 279.17 | 197.5  | 173.032 | 209.96 | 0.0788              | 293.1  | 219.57614 | 186.204 | 263.176 |
| 0.083               | 159.166 | 110.5  | 89.494 | 129.98 | 0.083               | 278.17 | 198.56 | 175.787 | 212.27 | 0.0825              | 299.26 | 223.55028 | 190.208 | 266.648 |
| 0.086               | 159.347 | 111.87 | 90.057 | 131.89 | 0.086               | 280.18 | 200.54 | 178.541 | 214.09 | 0.0863              | 302.61 | 227.52442 | 194.212 | 269.173 |
| 0.09                | 159.528 | 114.15 | 93.385 | 133.11 | 0.09                | 281.18 | 203.41 | 181.295 | 215.9  | 0.09                | 305.91 | 230.49856 | 198.216 | 273.478 |
| 0.094               | 159.709 | 116.4  | 95.763 | 134.33 | 0.094               | 281.68 | 207.18 | 183.05  | 217.71 | 0.0938              | 311    | 233.47271 | 202.22  | 277.738 |
| 0.098               | 159.89  | 117.72 | 96.284 | 135.55 | 0.098               | 282.19 | 208.16 | 184.804 | 219.53 | 0.0975              | 313.32 | 236.44685 | 205.224 | 281.85  |
| 0.101               | 160.071 | 118.55 | 96.797 | 136.16 | 0.101               | 282.69 | 210.03 | 186.558 | 221.34 | 0.1013              | 318.32 | 239.42099 | 208.228 | 284.962 |
| 0.105               | 160.252 | 119.37 | 97.302 | 136.78 | 0.105               | 283.19 | 211.88 | 188.012 | 223.15 | 0.105               | 318.77 | 242.09513 | 211.232 | 288.074 |
| 0.109               | 160.433 | 120.19 | 97.8   | 137.4  | 0.109               | 283.7  | 212.81 | 189.467 | 224.56 | 0.1088              | 322.78 | 244.76927 | 214.236 | 290.186 |
| 0.113               | 160.613 | 121.02 | 101    | 138.02 | 0.113               | 284.2  | 213.71 | 190.921 | 225.98 | 0.1125              | 325.86 | 247.44341 | 217.04  | 292.298 |
| 0.116               | 160.794 | 121.84 | 102.36 | 138.34 | 0.116               | 284.7  | 214.62 | 192.375 | 227.39 | 0.1163              | 328.01 | 249.11755 | 219.844 | 293.41  |
| 0.12                | 160.975 | 122.66 | 102.82 | 138.65 | 0.12                | 285.21 | 215.33 | 193.03  | 228.8  | 0.12                | 330.13 | 250.79169 | 222.648 | 294.522 |
| 0.124               | 161.156 | 123.19 | 103.28 | 138.97 | 0.124               | 285.71 | 216.04 | 193.684 | 230.02 | 0.1238              | 332.25 | 252.46583 | 225.452 | 295.634 |
| 0.128               | 161.337 | 123.71 | 103.72 | 139.29 | 0.128               | 286.21 | 216.75 | 194.338 | 231.23 | 0.1275              | 334.37 | 254.03997 | 227.256 | 296.746 |
| 0.131               | 161.518 | 124.23 | 105.92 | 139.61 | 0.131               | 286.71 | 217.25 | 194.592 | 232.44 | 0.1313              | 336.09 | 255.61412 | 229.061 | 297.458 |
| 0.135               | 161.699 | 124.76 | 108.1  | 139.73 | 0.135               | 287.22 | 217.76 | 194.847 | 233.66 | 0.135               | 337.81 | 257.18826 | 230.865 | 298.17  |
| 0.139               | 161.88  | 125.28 | 109.38 | 139.84 | 0.139               | 287.72 | 218.27 | 195.101 | 234.87 | 0.1388              | 339.53 | 258.5624  | 232.669 | 298.882 |
| 0.143               | 162.061 | 125.5  | 108.91 | 139.96 | 0.143               | 288.22 | 218.68 | 195.355 | 236.08 | 0.1425              | 341.05 | 259.93654 | 234.073 | 299.594 |
| 0.146               | 162.242 | 125.73 | 109.3  | 140.08 | 0.146               | 288.73 | 219.09 | 195.609 | 237.29 | 0.1463              | 342.58 | 261.31068 | 235.477 | 300.306 |
| 0.15                | 162.423 | 125.95 | 109.68 | 140.2  | 0.15                | 289.23 | 219.5  | 195.864 | 238.51 | 0.15                | 344.1  | 262.38482 | 236.881 | 301.018 |
| 0.154               | 162.604 | 126.17 | 110.07 | 140.31 | 0.154               | 289.73 | 219.9  | 196.118 | 239.72 | 0.1538              | 345.32 | 263.45896 | 238.285 | 301.73  |
| 0.158               | 162.785 | 126.4  | 110.45 | 140.43 | 0.158               | 290.24 | 220.31 | 196.372 | 240.93 | 0.1575              | 346.54 | 264.5331  | 239.689 | 302.442 |

The data in the second part of this section

| N | Average | Cohesion |      |      |      |
|---|---------|----------|------|------|------|
| 0 | 74.65   | 89       | 87.9 | 60   | 21.7 |
| 1 | 76.4    | 90.8     | 58.5 | 76.2 | 80.1 |
| 3 | 49.5    | 28.2     | 71.5 | 56.1 | 42.2 |
| 5 | 22.75   | 17.4     | 27.6 | 20   | 26   |

| W (%) | Average | Cohesion |      |      |      |
|-------|---------|----------|------|------|------|
| 5     | 56.35   | 89       | 90.8 | 28.2 | 17.4 |
| 10    | 68.375  | 87.9     | 58.5 | 71.5 | 37.6 |
| 15    | 53.075  | 60       | 76.2 | 56.1 | 20   |
| 20    | 36.5    | 21.7     | 75.1 | 42.2 | 26   |

| R (%) | Average | Cohesion |      |      |      |
|-------|---------|----------|------|------|------|
| 0     | 54.325  | 89       | 58.5 | 42.2 | 27.6 |
| 1     | 60.375  | 87.9     | 80.1 | 56.1 | 17.4 |
| 2     | 62.075  | 60       | 90.8 | 71.5 | 26   |
| 3     | 33.825  | 21.7     | 76.2 | 17.4 | 20   |

| $\rho_d$ / cm <sup>3</sup> | Average | Cohesion |      |      |      |
|----------------------------|---------|----------|------|------|------|
| 1.45                       | 53.925  | 89       | 58.5 | 42.2 | 26   |
| 1.5                        | 60.225  | 87.9     | 90.8 | 42.2 | 20   |
| 1.55                       | 48.975  | 60       | 80.1 | 28.2 | 27.6 |
| 1.6                        | 46.7    | 21.7     | 76.2 | 71.5 | 17.4 |

The data in the third part of this section

Figure 7 The relationship between the number of D-W cycles and internal

| N | Average | Cohesion |       |       |       |
|---|---------|----------|-------|-------|-------|
| 0 | 39.6775 | 33.44    | 37    | 51.11 | 37.16 |
| 1 | 32.17   | 21.84    | 30.13 | 34.19 | 42.52 |
| 3 | 19.9025 | 24.9     | 19.82 | 15.01 | 19.88 |
| 5 | 21.3725 | 23.42    | 21.9  | 22.09 | 23.08 |
